# Supplementary material for: Amphiphilic Polypeptides Obtained by the Post-Polymerization Modification of Poly(Glutamic Acid) and Their Evaluation as Delivery Systems for Hydrophobic Drugs
Source: MDPI journal article supplement (doi:10.3390/ijms24021049), 2023-01-05
Supplement: s1 [file s1]

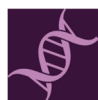

Supplementary Materials

# Amphiphilic Polypeptides Obtained by the Post-Polymerization Modification of Poly(Glutamic Acid) and Their Evaluation as Delivery Systems for Hydrophobic Drugs

Apollinariia Yu. Dzhuzha <sup>1,2</sup>, Irina I. Tarasenko <sup>2</sup>, Leonard Ionut Atanase <sup>3</sup>, Antonina Lavrentieva <sup>4</sup> and Evgenia G. Korzhikova-Vlakh <sup>2,\*</sup>

<sup>1</sup> Institute of Chemistry, Saint-Petersburg State University, 198504 St. Petersburg, Russia;

<sup>2</sup> Institute of Macromolecular Compounds, Russian Academy of Sciences, 199004 St. Petersburg, Russia;

<sup>3</sup> Faculty of Dental Medicine, "Apollonia" University, 700399 Iasi, Romania;

<sup>4</sup> Institute of Technical Chemistry, Gottfried-Wilhelm-Leibniz University, 30167 Hannover, Germany;

Correspondence: [vlakh@hq.macro.ru](mailto:vlakh@hq.macro.ru) (E.K.-V.)

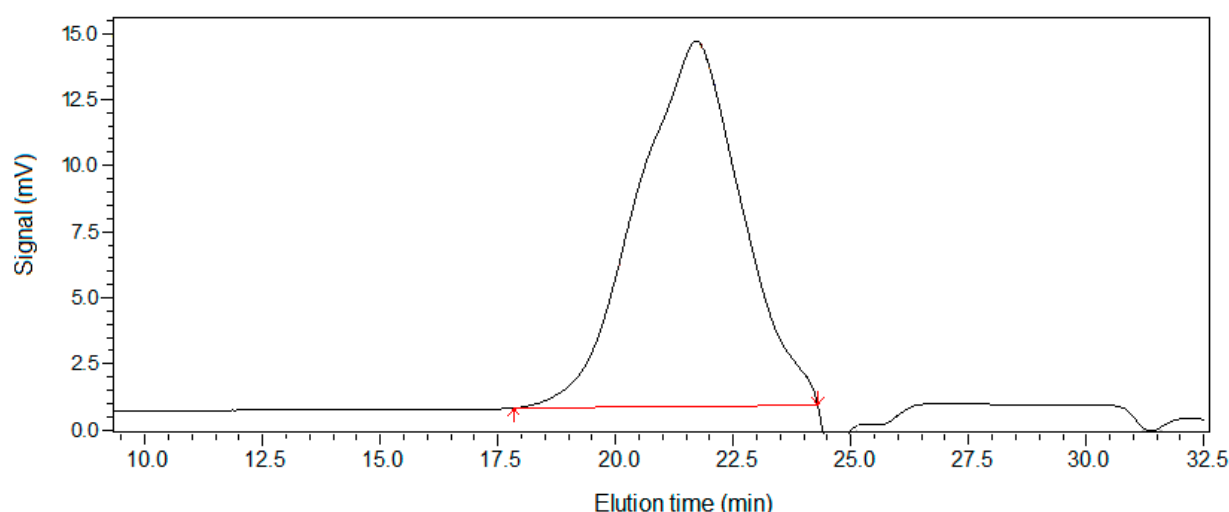

**Figure S1.** SEC trace of poly( $\alpha$ ,L-glutamic acid  $\gamma$ -benzyl ester). Conditions: Styragel Column, HMW6E, Waters (7.8 mm  $\times$  300 mm, 15–20  $\mu$ m bead size), DMF containing 0.1M LiBr, 40  $^{\circ}$ C, elution rate 0.3 mL/min, refractometric detection.

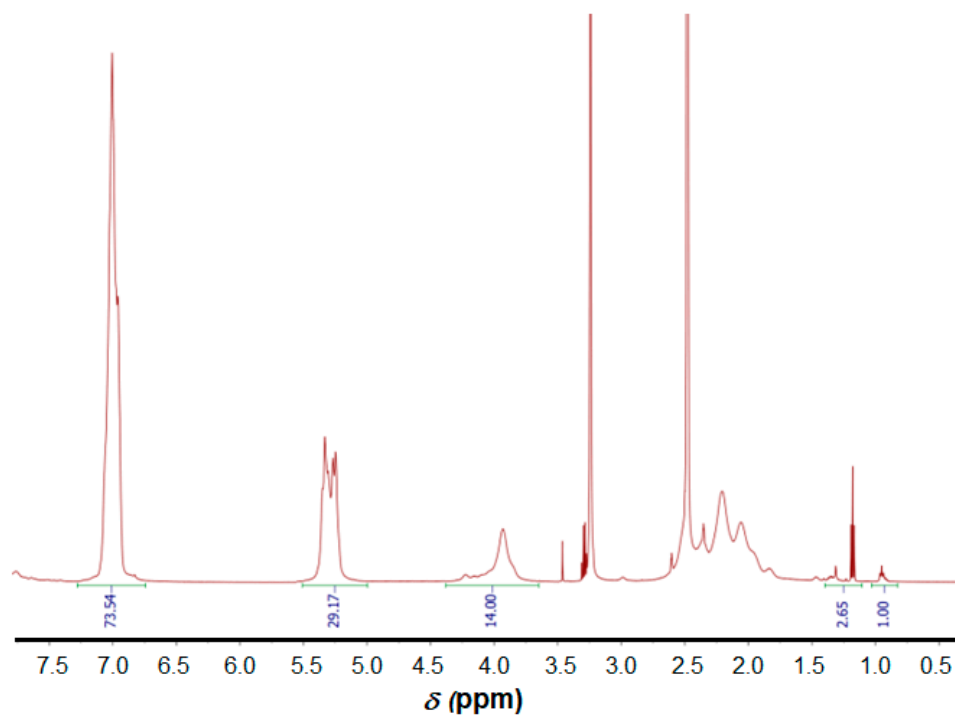

(a)

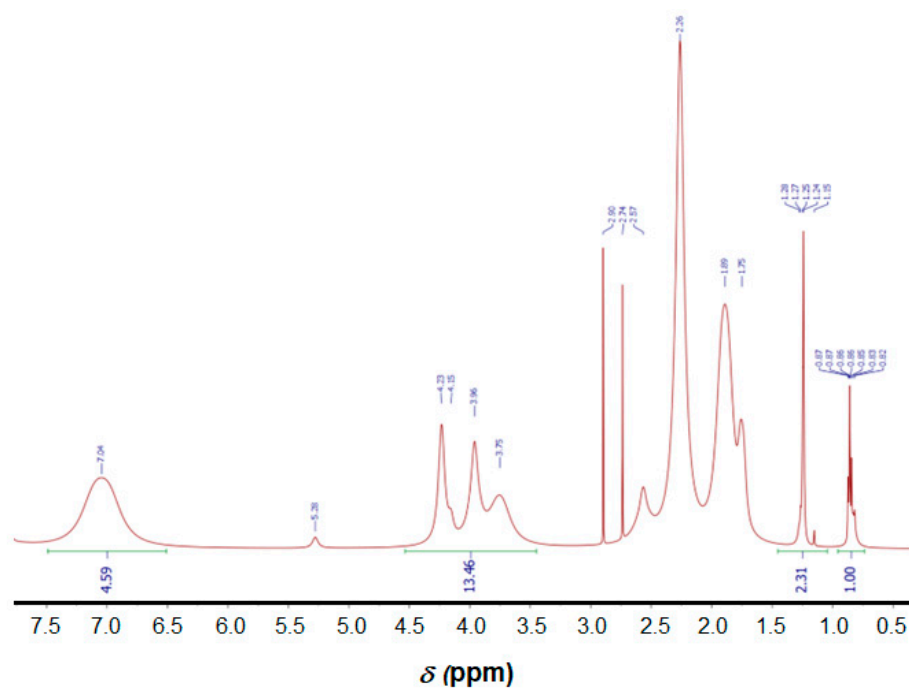

(b)

**Figure S2.**  $^1\text{H}$  NMR spectra of Bzl-protected (a) and deprotected (b) poly( $\alpha$ ,L-glutamic acid) (DMSO- $d_6$ , 25  $^\circ\text{C}$ ): Signals (ppm): 0.80-0.85 ( $\text{CH}_3$ , hexylamine), 1.00-1.33 ( $\text{CH}_2$ , hexylamine), 3.5-4.5 ( $\text{CH}$ , Glu), 5.0-5.5 (O- $\text{CH}_2$ - $\text{C}_6\text{H}_5$ , Glu(OBzl)), 6.7-7.4 (O- $\text{CH}_2$ - $\text{C}_6\text{H}_5$ , Glu(OBzl)).

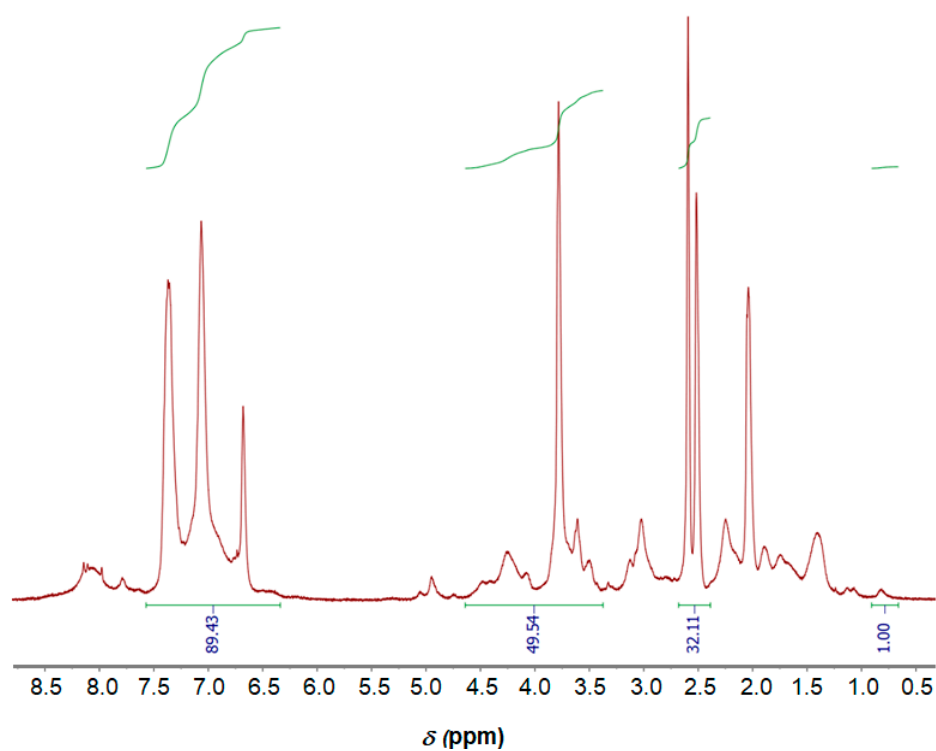

(a)

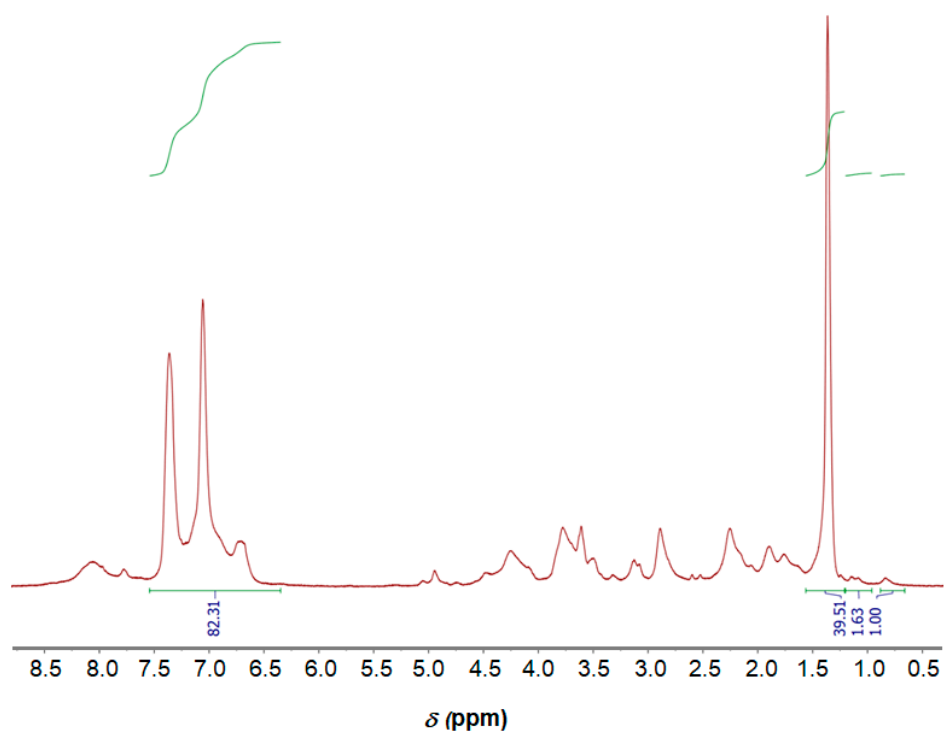

(b)

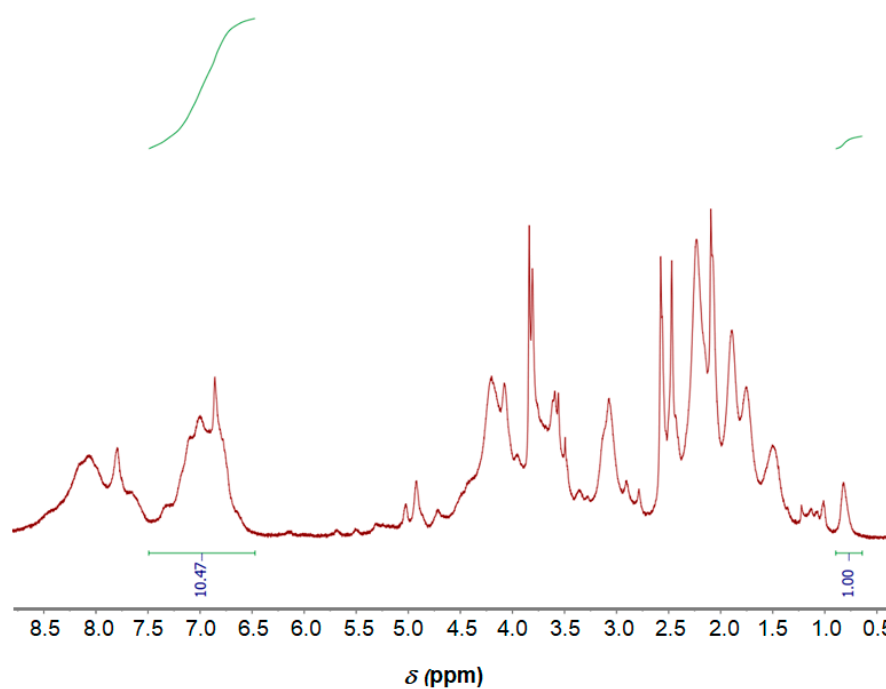

(c)

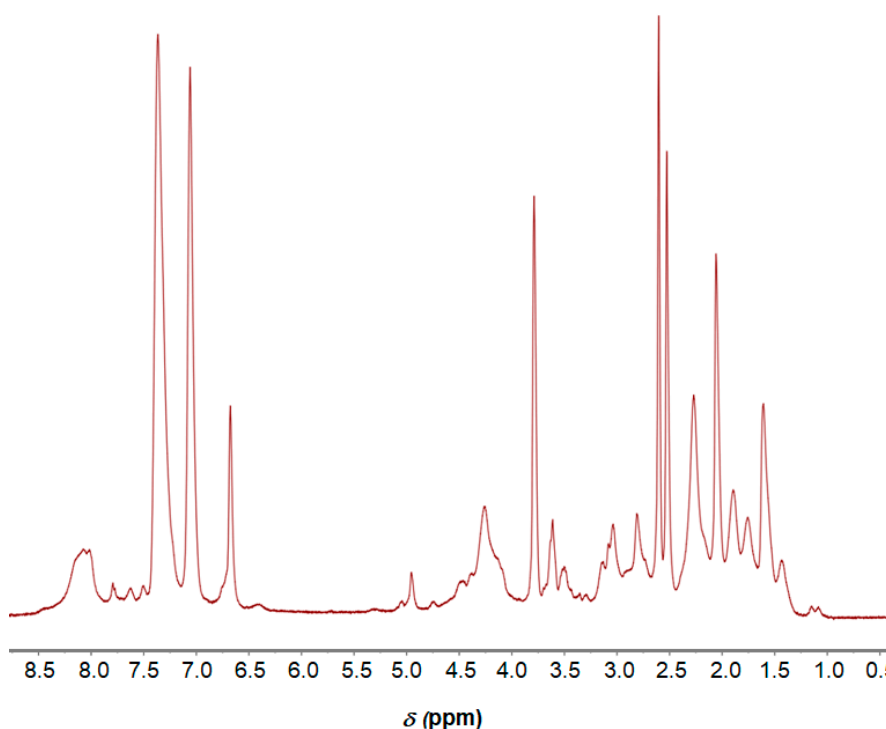

(d)

**Figure S3.**  $^1\text{H}$  NMR spectra of P[EE(R(Mtr))E(H(Trt))E(I)E(Glc)] (a), P[EE(O(Boc))E(H(Trt))E(I)E(Glc)] (b), P[EE(R)E(H)E(I)E(Glc)] (with diffusion filter) (c), P[EE(R(Mtr))E(H(Trt))E(W(Boc))E(Glc)] (with diffusion filter) (d). Signals (ppm): 0.80-0.85 ( $\text{CH}_3$ , hexylamine), 1.00-1.33 ( $\text{CH}_2$ , hexylamine), 1.2-1.5 ( $2\text{CH}_2$ , Arg;  $\text{CH}_3$ , Boc of Orn and Trp), 1.5-2.4 ( $2\text{CH}_2$ , Glu, Arg and Orn), 2.4-2.7 ( $\text{CH}_3\text{-C}_6\text{H}_5$ , Mtr of Arg), 2.7-3.5 ( $6\text{CH}_2$ , glucose;  $\text{CH}_2$ , Orn), 3.5-4.5 ( $\text{CH}$ , Glu;  $\text{CH}_3\text{-O-C}_6\text{H}_5$ , Arg;  $\text{CH}$ , Arg, His, Orn, Trp;  $\text{CH}_2$ , His), 6.3-7.5 ( $\text{C}_6\text{H}_5$ , Trt of His;  $2\text{H}$ , His;  $\text{C}_6\text{H}_5$ , Mtr of Arg;  $\text{C}_6\text{H}_5$ , Trp), 1.4 ( $\text{CH}_3$ , BOC of Orn), 7.8-8.5 ( $\text{NH-CO}$ , all polypeptides;  $\text{NH}_2\text{-C=NH}$ , Arg).

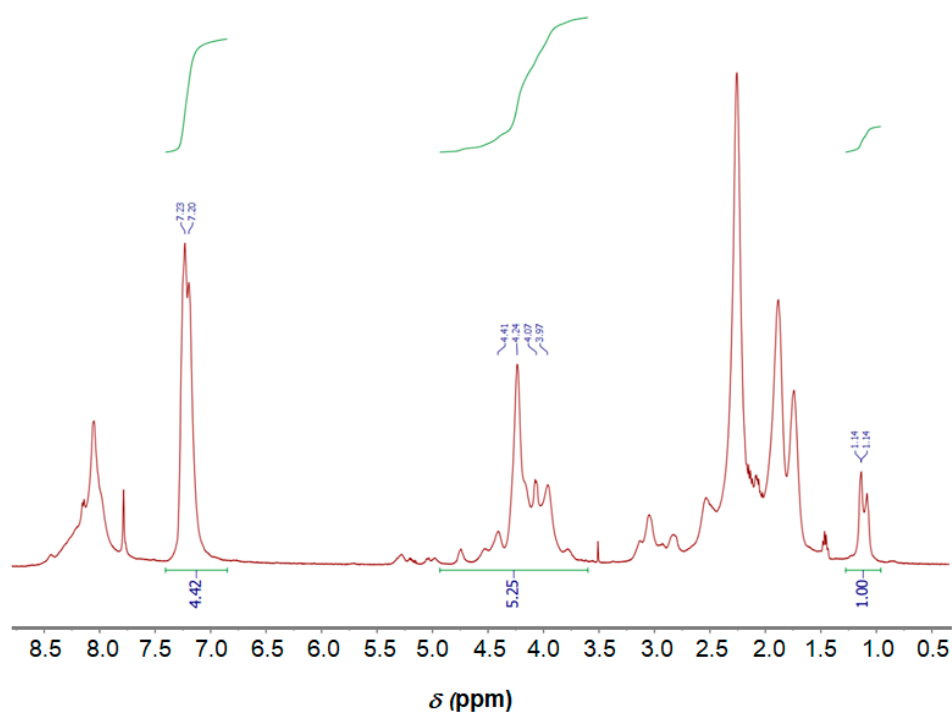

(a)

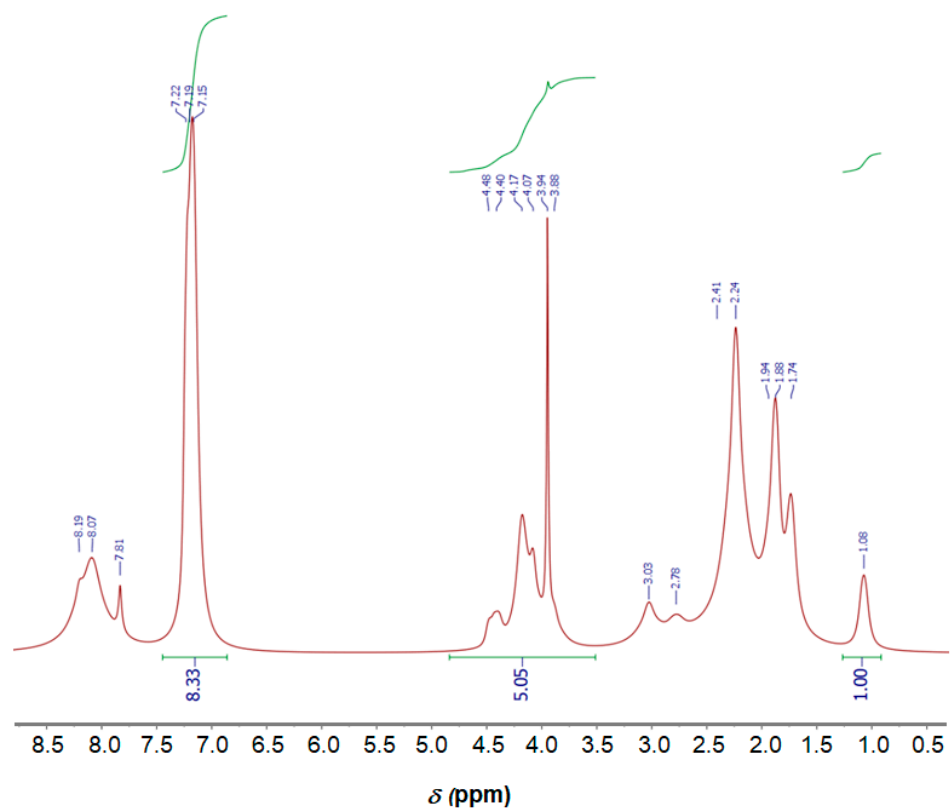

(b)

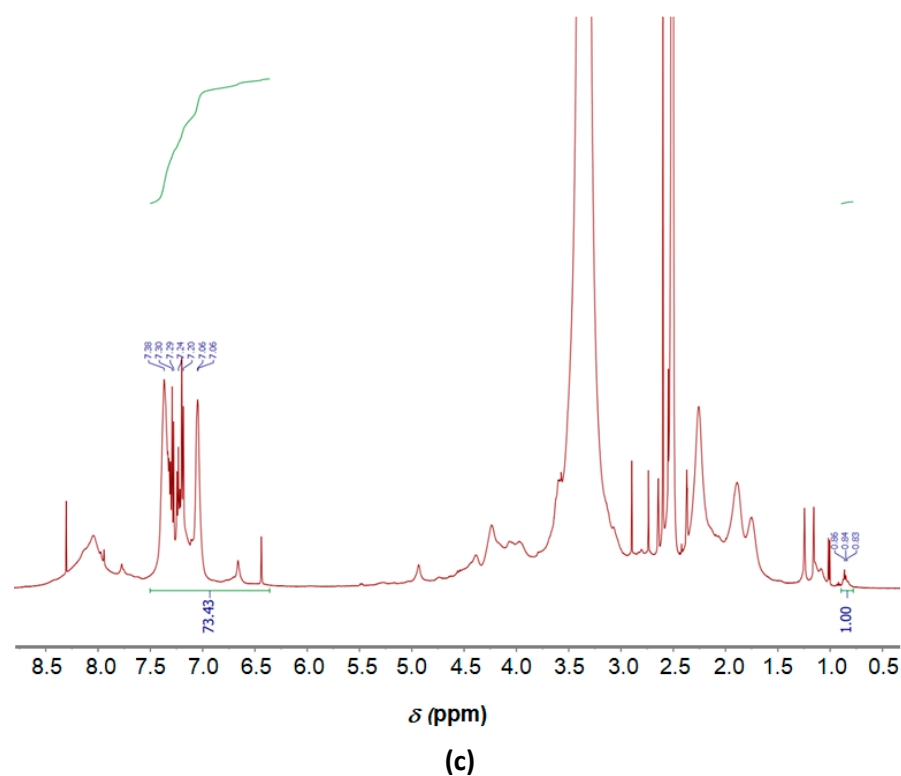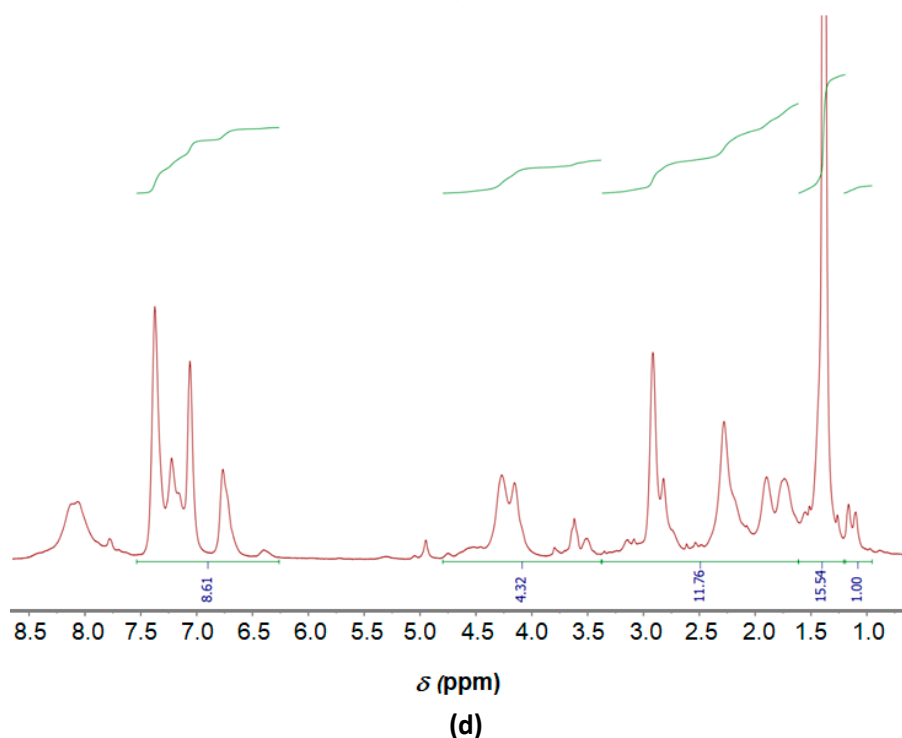

**Figure S4.**  $^1\text{H}$  NMR spectra (DMSO- $d_6$ , 25  $^\circ\text{C}$ ) of poly( $\alpha$ ,L-glutamic acid) modified with: **(a, b)** Phe (a – precursor polymer for P[EE(O)E(H)E(F)E(Glc)]; b – precursor polymer for P[EE(O)E(F)E(H<sub>6</sub>-pept)]); **(c)** Phe, His(Trt) and Glc; **(d)** Phe, Orn(Boc), His(Trt) and Glc (with diffusion filter). *Signals (ppm):* 0.80-0.85 ( $\text{CH}_3$ , hexylamine), 1.00-1.3 ( $\text{CH}_2$ , hexylamine), 1.3-1.5 ( $\text{CH}$ , Boc of Orn), 1.5-2.4 ( $2\text{CH}_2$ , Glu, and Orn), 2.7-3.5 ( $6\text{CH}_2$ , glucose;  $\text{CH}_2$ , Orn), 3.5-4.5 ( $\text{CH}$ , Glu;  $\text{CH}$ , His and Orn;  $\text{CH}_2$ , His), 6.3-7.5 ( $\text{C}_6\text{H}_5$ , Trt of His;  $2\text{H}$ , His), 7.8-8.5 ( $\text{NH-CO}$ , all polypeptides;  $\text{NH}_2\text{-C=NH}$ , Arg).

**Table S1.** Composition of the amphiphilic copolymers determined by  $^1\text{H}$  NMR spectroscopy.

| Sample                                                | Modifier                        |          |            |                      |                                      |
|-------------------------------------------------------|---------------------------------|----------|------------|----------------------|--------------------------------------|
|                                                       | Determined composition (mol%) * |          |            |                      |                                      |
|                                                       | <i>R</i> or <i>O</i>            | <i>H</i> | <i>Glc</i> | <i>F</i> or <i>I</i> | <i>H</i> <sub>6</sub> - <i>pept.</i> |
| P[EE( <b>O</b> )E(H)E( <b>F</b> )E(Glc)]              | 33                              | 26       | 17         | 10                   | –                                    |
| P[EE( <b>R</b> )E(H)E( <b>I</b> )E(Glc)]              | 25                              | 24       | 21         | N/D                  | –                                    |
| P[EE( <b>O</b> )E(H)E( <b>I</b> )E(Glc)]              | 31                              | 24       | 19         | N/D                  | –                                    |
| P[EE( <b>O</b> )E( <b>F</b> )E(H <sub>6</sub> -pept)] | 42                              | –        | –          | 26                   | N/D                                  |

\*Side-chain amino acids and glucosamine were calculated relative to glutamic acid, taken as 100%.

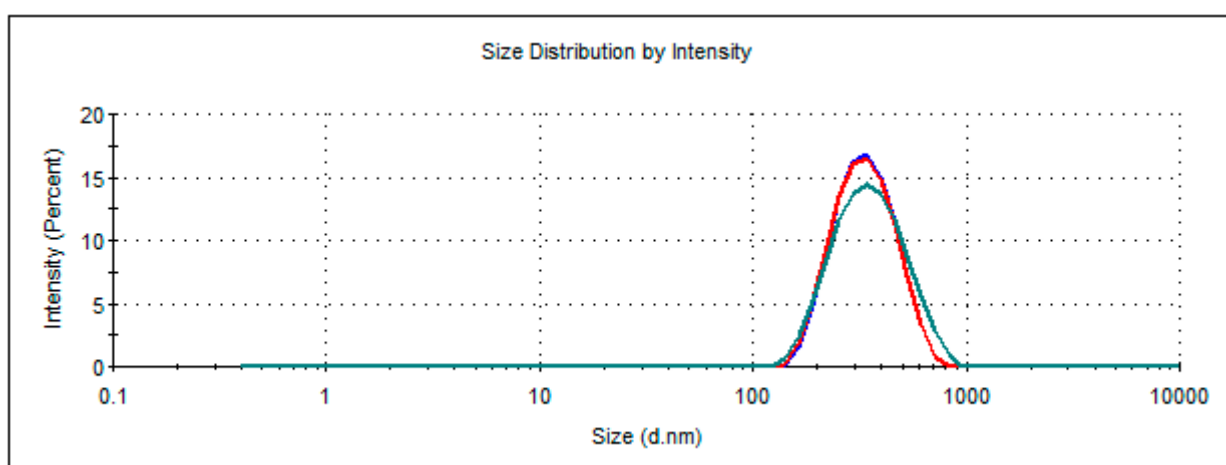

(a)

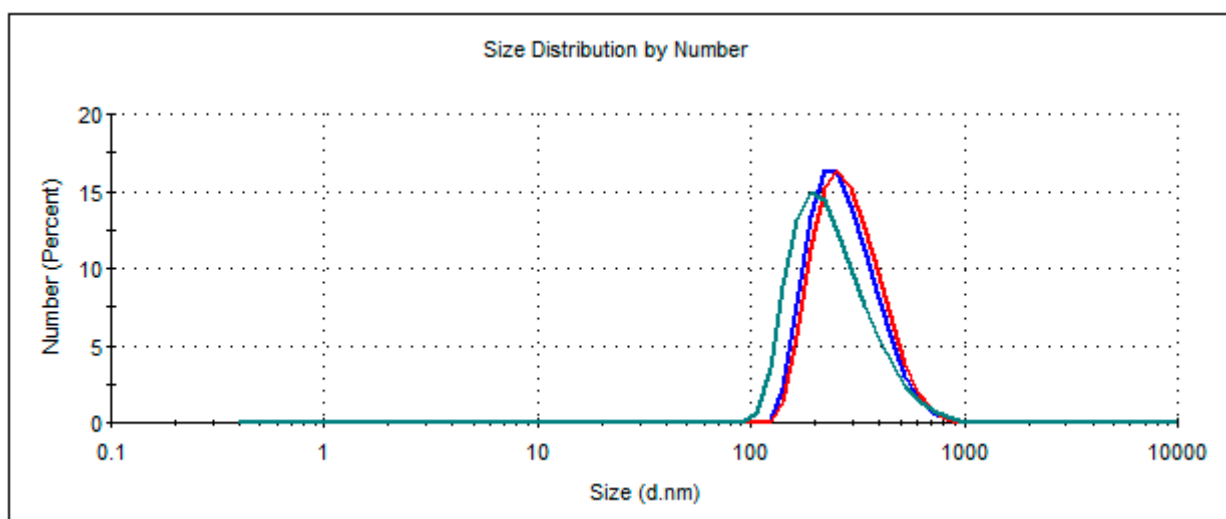

(b)

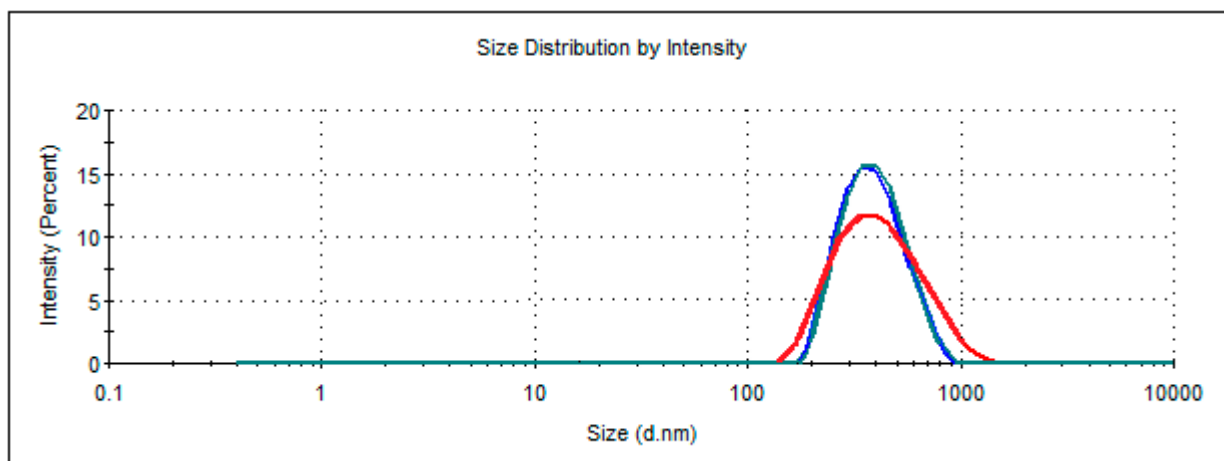

(c)

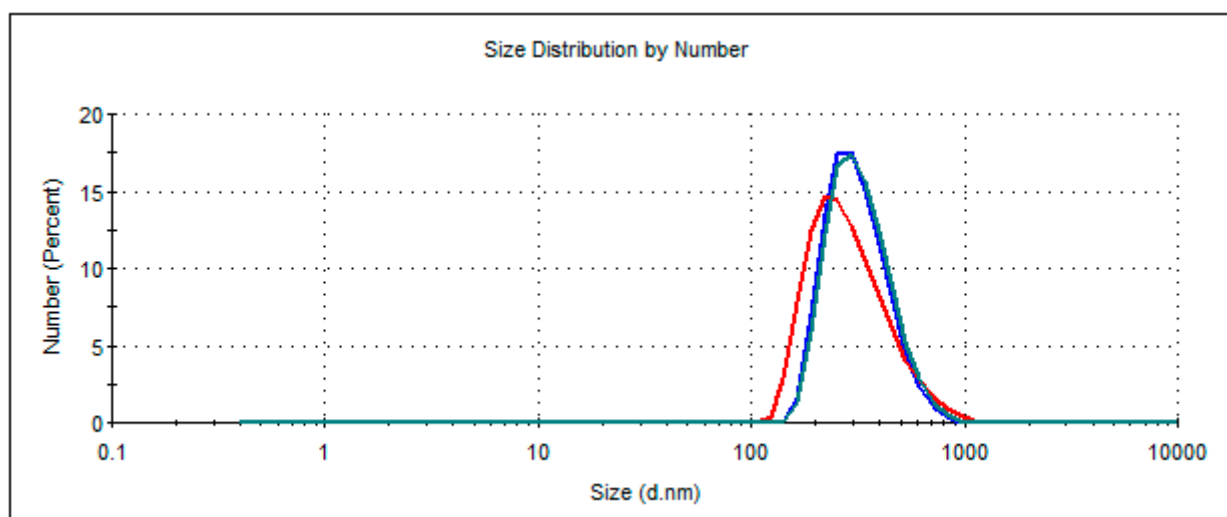

(d)

**Figure S5.** Hydrodynamic diameter distribution measured by intensity (a,c) and by number (b,d) (DLS) for P[EE(O)E(H)E(I)E(Glc)] (a,b) and P[EE(O)E(F)E(H<sub>6</sub>-pept)] (c, d) nanoparticles.

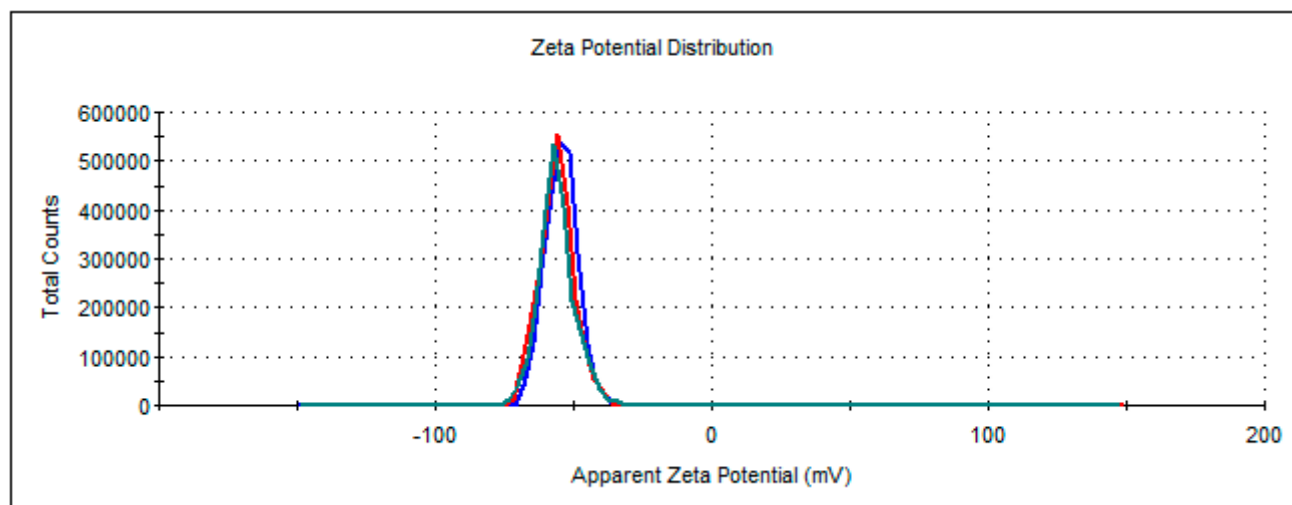

(a)

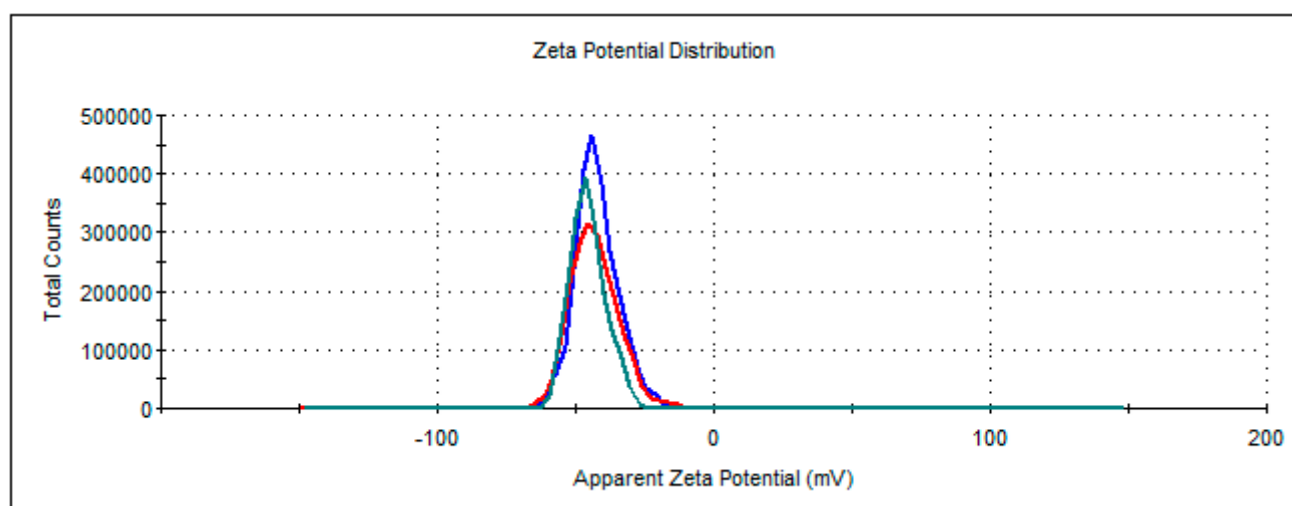

(b)

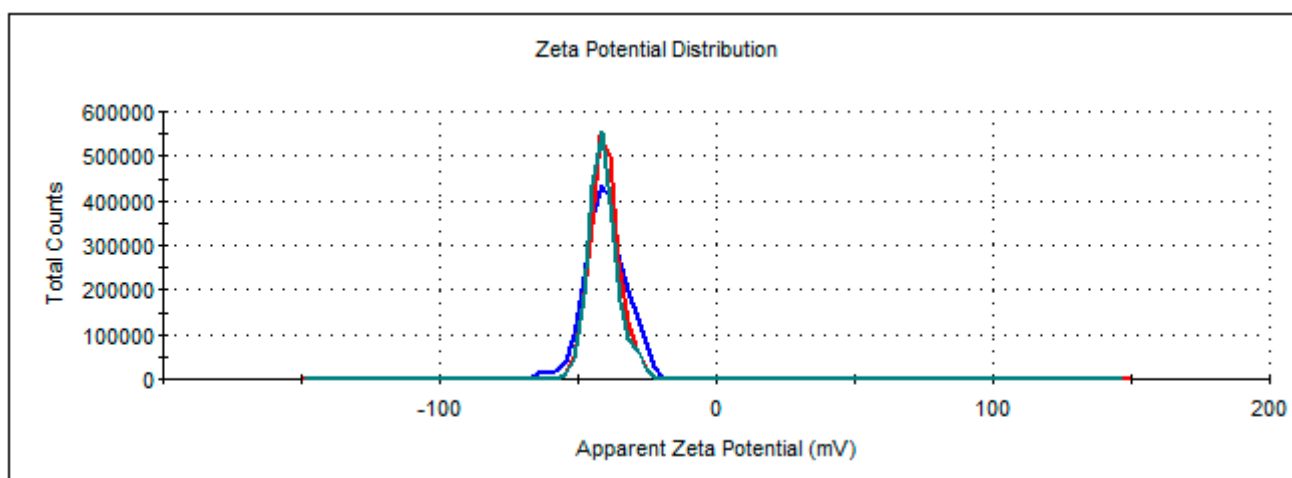

(c)

**Figure S6.** Zeta-potential distribution obtained by ELS for P[EE(R)E(H)E(I)E(Glc)] (a), P[EE(O)E(H)E(I)E(Glc)] (b) and P[EE(O)E(F)E(H<sub>6</sub>-pept)] (c) nanoparticles.

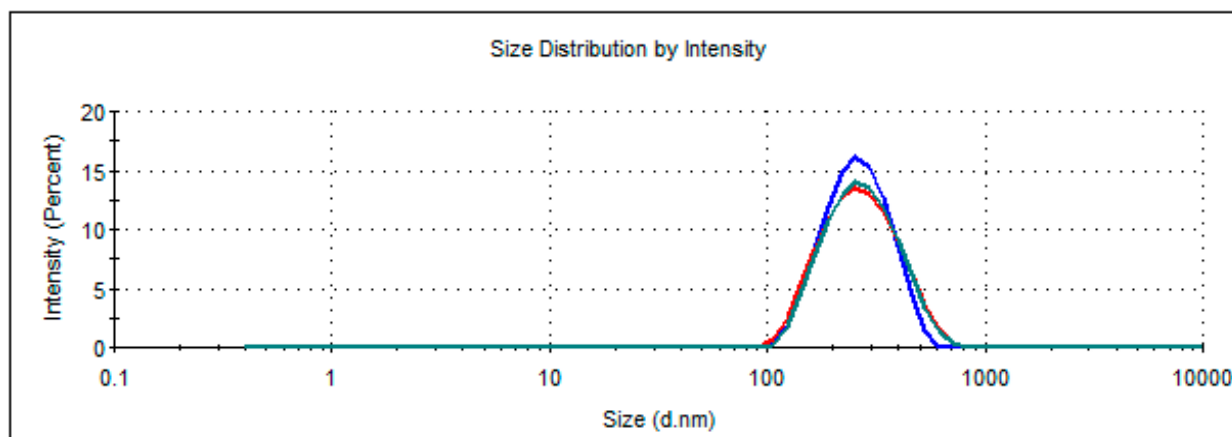

(a)

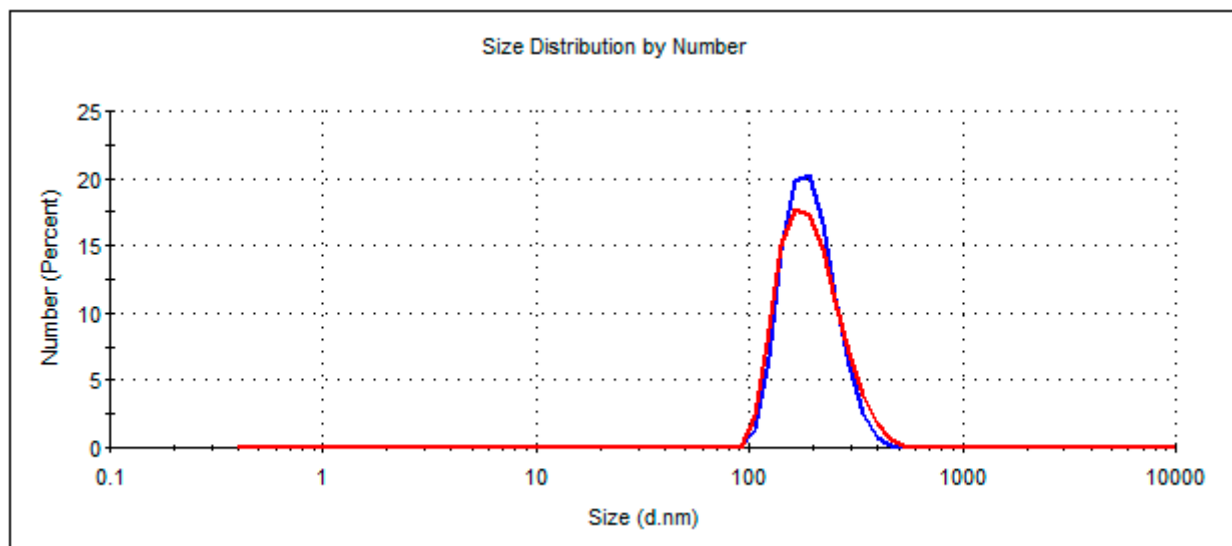

(b)

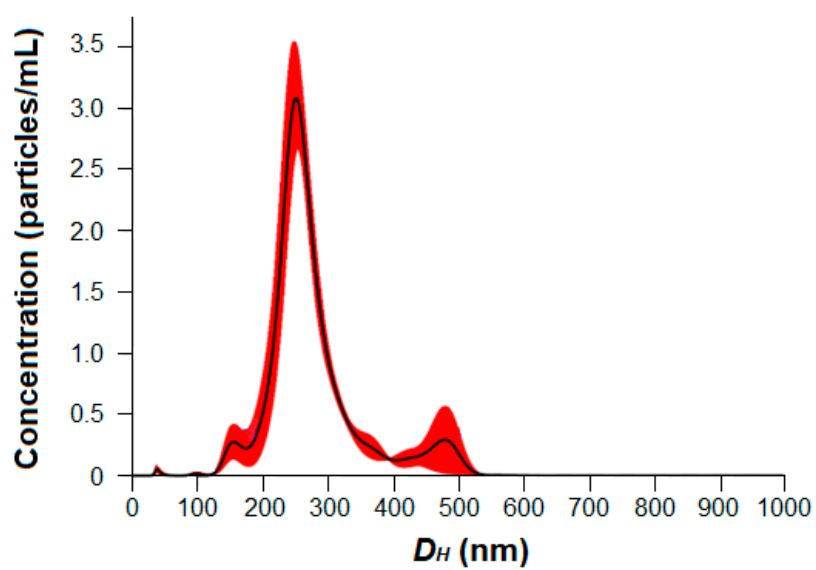

(c)

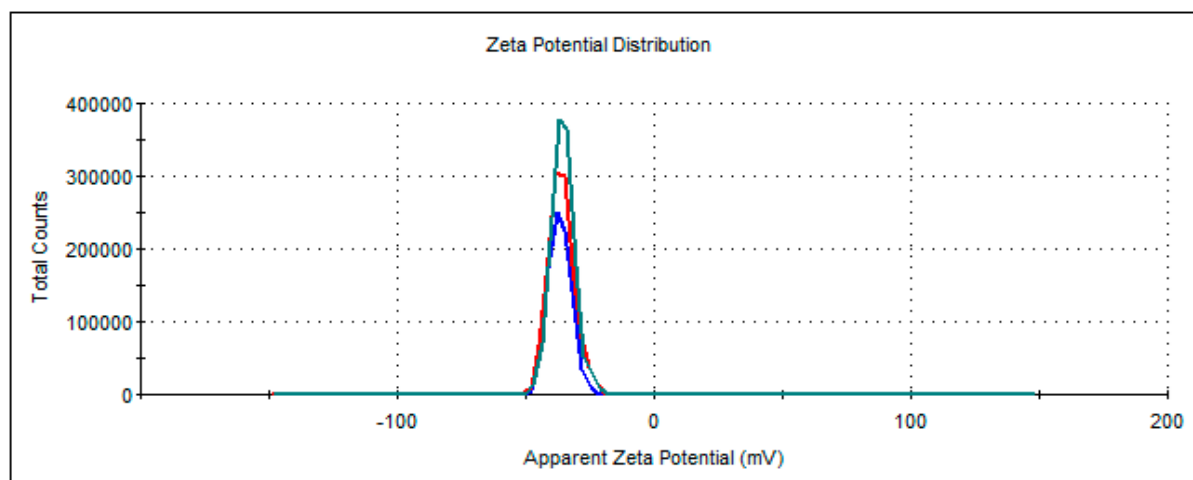

(d)

**Figure S7.** Hydrodynamic diameter distribution (a-c) and zeta-potential distribution (d) measured for PTX-loaded nanoparticles based on P[EE(R)E(H)E(I)E(Glc)] using: DLS by intensity (a), DLS by number (b), NTA (c), ELS (d).

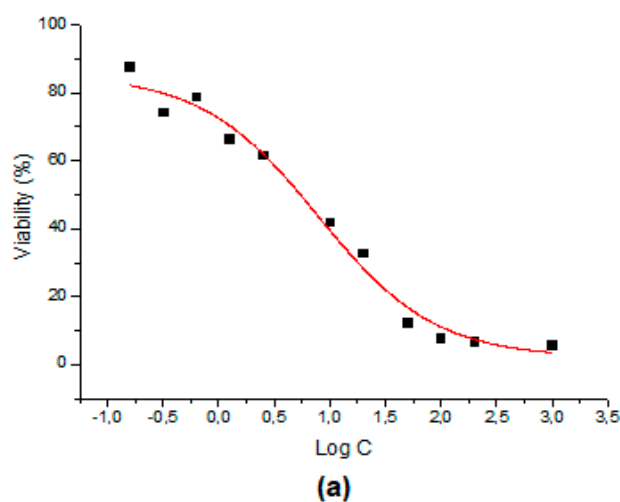

(a)

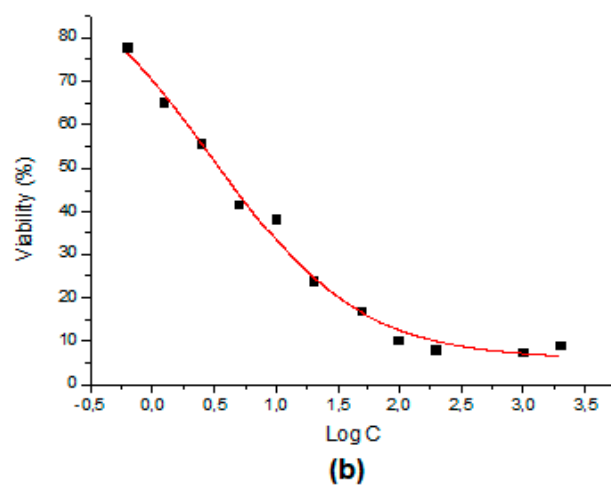

(b)

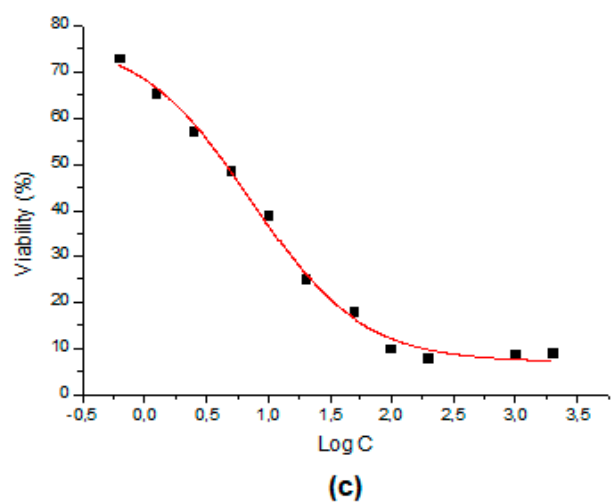

(c)

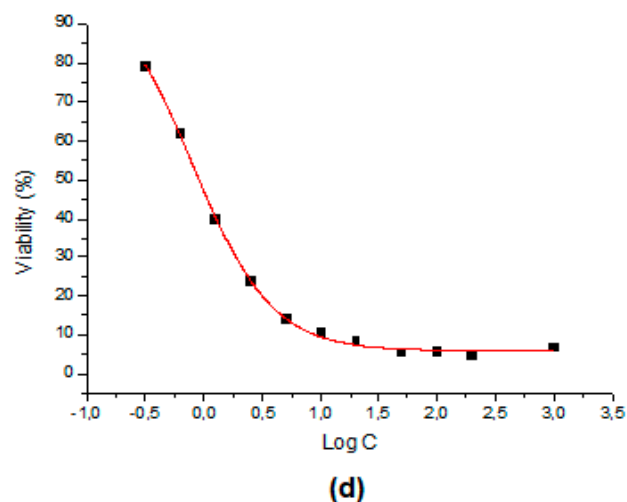

(d)

**Figure S8.** Dose response curves illustrating the inhibition of A549 by PTX nanoformulations (a-c) and free PTX (d): PTX/ P[EE(R)E(H)E(F)E(Glc)] (a), PTX/ P[EE(O)E(H)E(I)E(Glc)] (b), PTX/ P[EE(O)E(F)E(H<sub>6</sub>-pept)] (c).

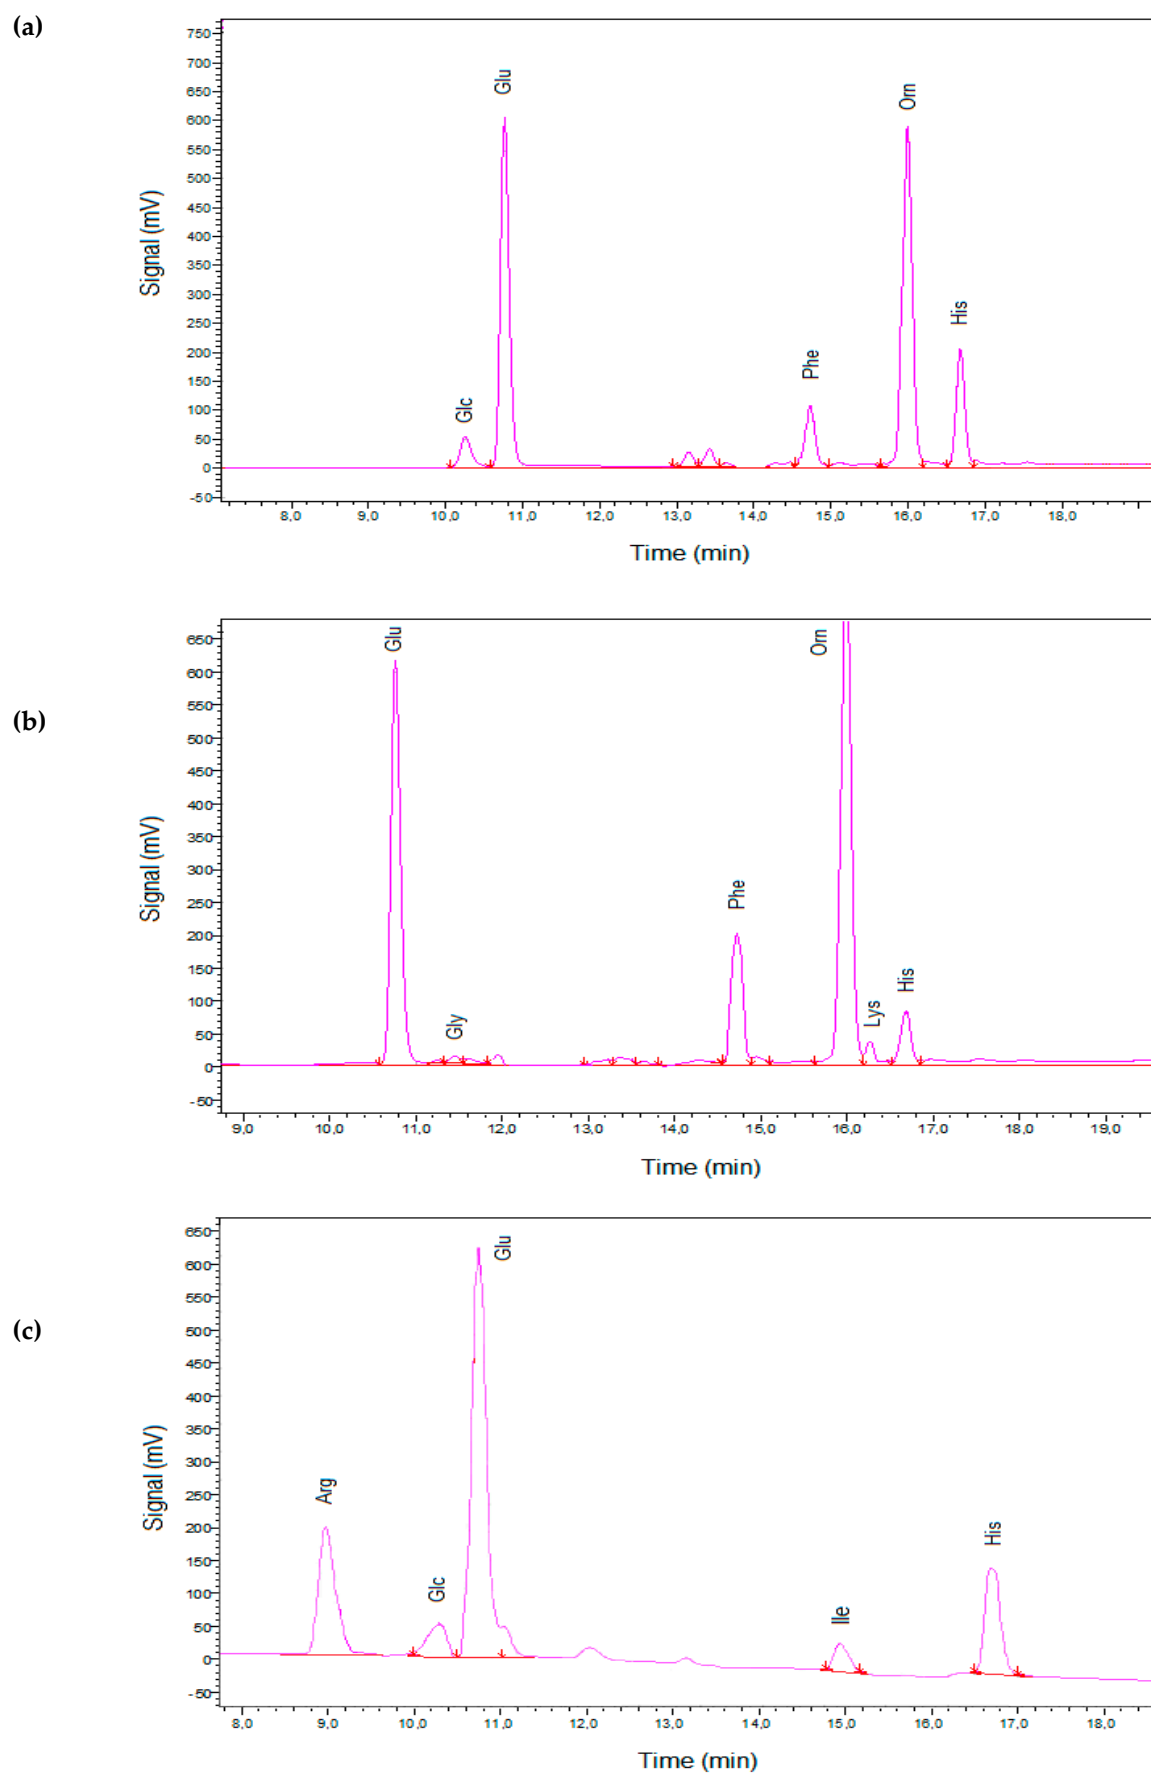

(d)

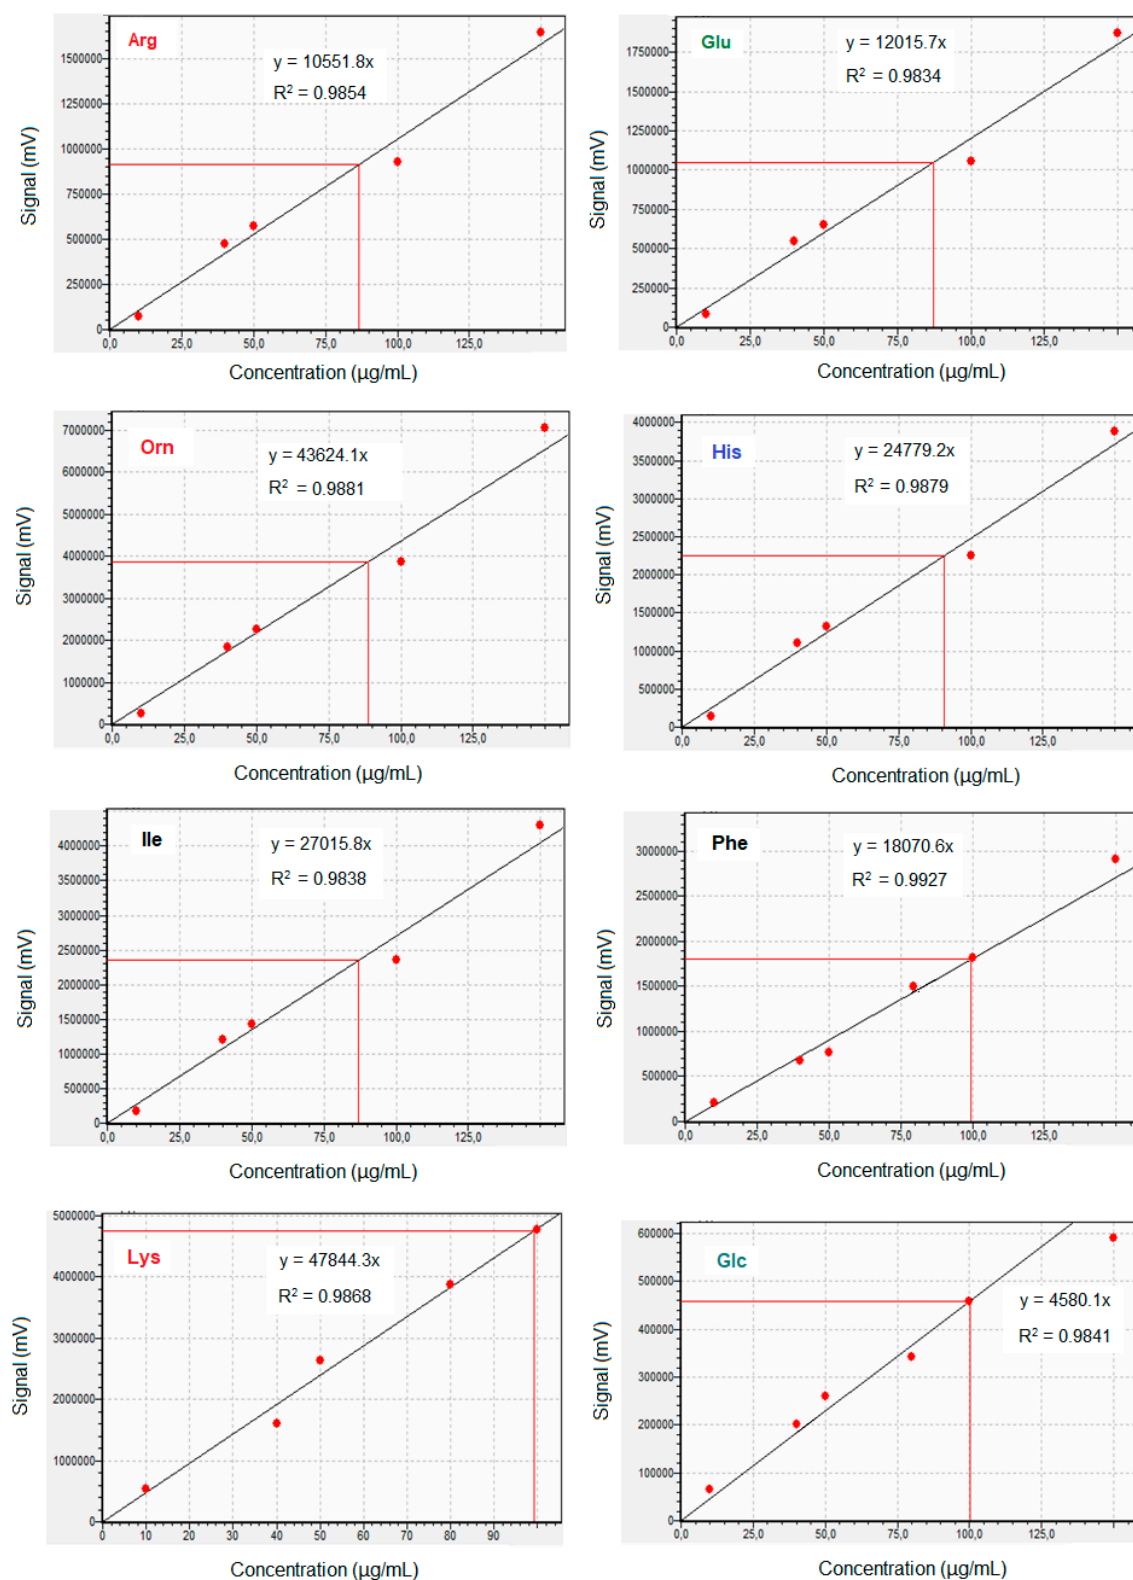

**Figure S9.** Chromatograms of HPLC amino acid and glucosamine analysis (a–c), obtained after total acidic hydrolysis of (glycol)polypeptides: P[EE(O)E(H)E(F)E(Glc)] (a), P[EE(O)E(F)E(H<sub>6</sub>-pept)] (b), P[EE(R)E(H)E(F)E(Glc)] (c) and calibration curves built for individual components (d).
